# Supplementary material for: Effect of a Multifaceted Intervention on Children’s Body Image and the Mediating Role of Body Image in Changes in Adiposity Indicators
Source: MDPI journal article supplement (doi:10.3390/nu15183951), 2023-09-12
Supplement: s1 [file s1]

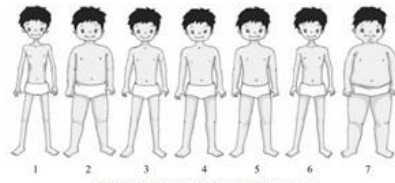

(a) Ma figural stimuli for boys

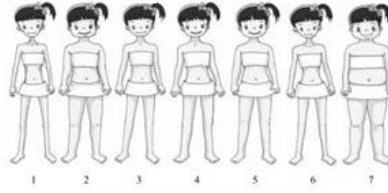

(b) Ma figural stimuli for girls

**Supplementary Figure S1. Ma figural stimuli.**
